# Supplementary material
Source: PubMed Central journal article supplement (PMC8532040)

## Supplemental Online Content

Hirsch L, Martinez Chanza N, Farah S, et al. Clinical activity and safety of cabozantinib for brain metastases in patients with renal cell carcinoma. *JAMA Oncol*. Published online October 21, 2021. doi:10.1001/jamaoncol.2021.4544

**eTable 1.** Prior systemic therapies to cabozantinib

**eTable 2.** Antitumor activity of cabozantinib according to baseline characteristics

**eTable 3.** Overall incidence of adverse events considered related to cabozantinib

**eFigure.** Gadolinium enhanced brain magnetic resonance imaging of one patient in cohort A (no history of brain radiotherapy). Left cerebellum metastasis measured 7 mm at baseline, 4 mm at 12 week follow-up representing partial response

This supplemental material has been provided by the authors to give readers additional information about their work.

eTable 1. Prior systemic therapies to cabozantinib

| Prior treatment        | Total population (N = 88)<br>N (%) <sup>1</sup> |
|------------------------|-------------------------------------------------|
| ≥ 1 VEGFR TKI agent    | 68 (77)                                         |
| Sunitinib              | 49 (56)                                         |
| Pazopanib              | 25 (28)                                         |
| Axitinib               | 20 (23)                                         |
| Temsirolimus           | 4 (5)                                           |
| Everolimus             | 11 (12.5)                                       |
| Anti PD-1              | 48 (55)                                         |
| Nivolumab + Ipilimumab | 20 (23)                                         |
| ICI + anti- VEGF(R)    | 5 (6)                                           |

Abbreviations: ICI: Immune Checkpoint Inhibitor;

<sup>1</sup>Patients may have received more than 1 prior therapy

eTable 2. Antitumor activity of cabozantinib according to baseline characteristics

|                              | Cohort A <sup>1</sup> |                            | Cohort B <sup>2</sup> |                            |
|------------------------------|-----------------------|----------------------------|-----------------------|----------------------------|
|                              | N = 31                | Intracranial response rate | N = 53                | Intracranial response rate |
| Number of brain metastases   |                       |                            |                       |                            |
| -1                           | 6                     | 3 (50%)                    | 12                    | 3 (25%)                    |
| -2                           | 7                     | 4 (57%)                    | 17                    | 9 (53%)                    |
| -≥3                          | 17                    | 9 (53%)                    | 24                    | 13 (54%)                   |
| - unknown                    | 1                     | 1                          |                       |                            |
| Prior brain-directed therapy |                       |                            |                       |                            |
| -No                          | 11                    | 8 (73%)                    | 2                     | 2 (100%)                   |
| -Yes                         | 20                    | 9 (45%)                    | 51                    | 23 (45%)                   |
| IMDC risk group              |                       |                            |                       |                            |
| -Favorable                   | 7                     | 4 (57%)                    | 4                     | 2 (50%)                    |
| -Intermediate                | 12                    | 10 (83%)                   | 30                    | 13 (43%)                   |
| -Poor                        | 12                    | 3 (25%)                    | 18                    | 10 (56%)                   |
| - Unknown                    | -                     | -                          | 1                     | 0                          |

Abbreviations: TTF: Time to treatment failure; OS: Overall Survival

<sup>1</sup> Evidence of radiological intracranial progressive disease at baseline (prior brain-directed local therapy was allowed if radiological confirmation of intracranial progression before starting cabozantinib).

<sup>2</sup> Patients with stable brain metastases at cabozantinib initiation or patients with progressing BM concomitantly treated by brain-directed local therapy. Concomitant brain-directed local therapy was defined as any brain-directed local therapy within two months prior to cabozantinib initiation.

eTable 3. Overall incidence of adverse events considered related to cabozantinib

| Adverse Events                         | Treatment population (N= 88) |           |           |           |           |           |               |          |
|----------------------------------------|------------------------------|-----------|-----------|-----------|-----------|-----------|---------------|----------|
|                                        | Overall                      |           | Grade 1-2 |           | Grade 3-4 |           | Unknown grade |          |
|                                        | N                            | %         | N         | %         | N         | %         | N             | %        |
| <b>No. of subjects with any events</b> | <b>81</b>                    | <b>92</b> | <b>79</b> | <b>90</b> | <b>15</b> | <b>17</b> | <b>6</b>      | <b>7</b> |
| Fatigue                                | 68                           | 77        | 59        | 67        | 6         | 7         | 3             | 3        |
| Diarrhea                               | 40                           | 46        | 39        | 44        | 1         | 1         | -             | -        |
| Palmar-plantar erythrodysesthesia      | 28                           | 32        | 26        | 30        | 2         | 2         | -             | -        |
| Nausea                                 | 27                           | 31        | 23        | 23        | 1         | 1         | 3             | 3        |
| Mucositis                              | 25                           | 28        | 20        | 26        | 4         | 5         | 1             | 1        |
| Hypertension                           | 22                           | 25        | 20        | 23        | -         | -         | 2             | 2        |
| Vomiting                               | 14                           | 16        | 12        | 14        | 1         | 1         | 1             | 1        |
| Transaminitis                          | 10                           | 11        | 9         | 10        | -         | -         | 1             | 1        |
| Hypothyroidism                         | 5                            | 6         | 5         | 6         | -         | -         | -             | -        |
| Thrombocytopenia                       | 4                            | 5         | 2         | 2         | 2         | 2         | -             | -        |
| Dyspnea                                | 4                            | 5         | 3         | 3         | -         | -         | 1             | 1        |
| Proteinuria                            | 3                            | 3         | 1         | 1         | 1         | 1         | 1             | 1        |
| Neutropenia                            | 1                            | 1         | -         | -         | 1         | 1         | -             | -        |

Data are n (%). Includes adverse events after the date of first dose and including 30 days after the date of last dose of cabozantinib. Patients with multiple occurrences of the same toxicity were counted only once at the maximum grade. No grade 5 adverse events were reported.

eFigure. Gadolinium enhanced brain magnetic resonance imaging of one patient in cohort A (no history of brain radiotherapy). Left cerebellum metastasis measured 7 mm at baseline, 4 mm at 12 week follow-up representing partial response

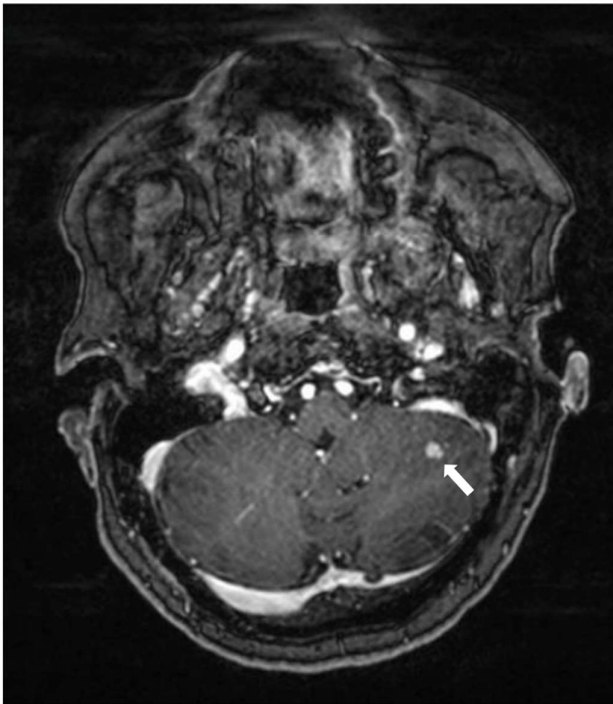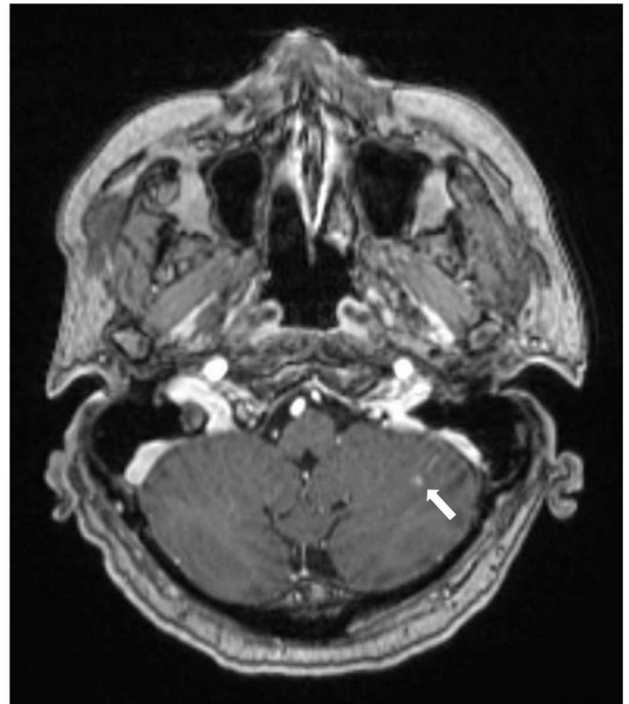

Supplement: jamaoncol-e214544-s001.pdf [file jamaoncol-e214544-s001.pdf]
